# Supplementary material for: Prevalence and Factors Associated with the Triple Burden of Malnutrition among Mother-Child Pairs in Sub-Saharan Africa
Source: MDPI journal article supplement (doi:10.3390/nu13062050), 2021-06-15
Supplement: s1 [file s1]

| <b>Variable</b>          | <b>VIF</b> | <b>SQRT<br/>VIF</b> | <b>Tolerance</b> | <b>R-<br/>Squared</b> |
|--------------------------|------------|---------------------|------------------|-----------------------|
| Age of child             | 1.03       | 1.01                | 0.971            | 0.029                 |
| Sex of child             | 1.00       | 1.00                | 0.996            | 0.004                 |
| Perceived birth size     | 1.01       | 1.01                | 0.986            | 0.014                 |
| Birth order              | 1.22       | 1.11                | 0.818            | 0.182                 |
| Educational attainment   | 1.48       | 1.22                | 0.677            | 0.323                 |
| Employment status        | 1.05       | 1.02                | 0.956            | 0.044                 |
| ANC                      | 1.11       | 1.05                | 0.903            | 0.097                 |
| Age of household head    | 1.26       | 1.12                | 0.795            | 0.205                 |
| Sex of household head    | 1.04       | 1.02                | 0.962            | 0.038                 |
| Household size           | 1.36       | 1.17                | 0.735            | 0.266                 |
| Wealth status            | 1.77       | 1.33                | 0.565            | 0.435                 |
| Source of drinking water | 1.09       | 1.04                | 0.918            | 0.082                 |
| Type of toilet facility  | 1.29       | 1.14                | 0.774            | 0.227                 |
| Type of cooking fuel     | 1.33       | 1.15                | 0.754            | 0.246                 |
| Access to electricity    | 1.72       | 1.31                | 0.582            | 0.418                 |
| Urbanicity               | 1.58       | 1.26                | 0.632            | 0.368                 |
| Geographic region        | 1.17       | 1.08                | 0.852            | 0.148                 |
| Mean                     | 1.27       |                     |                  |                       |
